# Supplementary material for: “ANALISIS PENGARUH KUALITAS PRODUK, KUALITAS PELAYANAN, DAN CUSTOMER VALUE TERHADAP KEPUASAN PELANGGAN DAN DAMPAKNYA TERHADAP POSITIVE WORD OF MOUTH”(Studi pada Pelanggan Telkom Speedy di Semarang)
Source: Springer Nature journal article supplement (doi:10.1186/s13023-018-0946-8), 2014-09-24

**Figure S1. The mean blood trough level of sirolimus during the first two years of treatment**

Dots and error bars show the mean ± 95% confidential interval


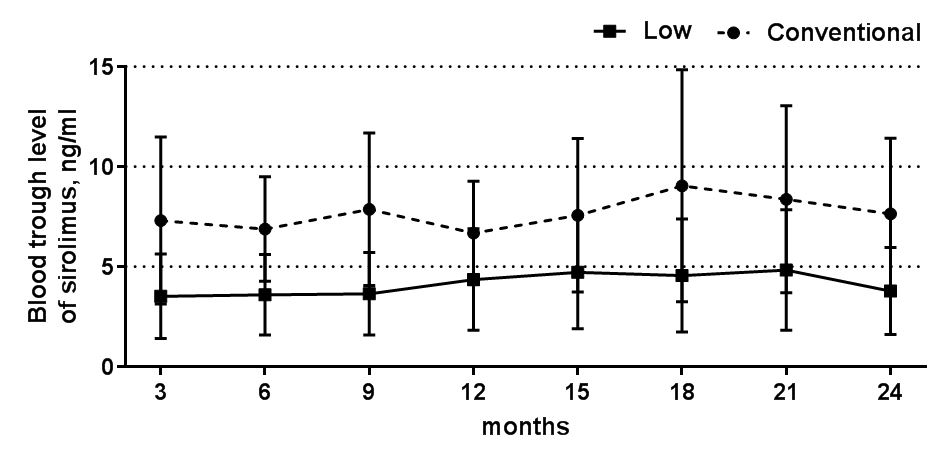

Supplement: MOESM1 [file 16271818]
